# Supplementary material for: Modifying the electron structure of an FeCoNiZnCu high-entropy alloy with the introduction of Cu to facilitate the catalytic effect in lithium sulfur batteries
Source: Royal Society of Chemistry journal article supplement (doi:10.1039/d4ta01530d), 2024-01-01
Supplement: d4ta01530d1.pdf [file d4ta01530d1.pdf]

# Modifying electron structure of FeCoNiZnCu high-entropy alloy with introduction of Cu for facilitating the catalytic effect in lithium sulfur batteries

Liping Chen<sup>1</sup>, Dingding Wu<sup>1</sup>, Xin Li<sup>1</sup>, Yong Li<sup>1</sup>, Guannan Zu<sup>1</sup>, Shuyue Li<sup>1</sup>, Kai Li<sup>2</sup>, Juan Wang<sup>1,\*</sup>

<sup>1</sup>Shaanxi Key Laboratory of Nanomaterials and Nanotechnology, Xi'an Key Laboratory of Clean Energy, Xi'an University of Architecture and Technology, Xi'an 710055, P.R. China

<sup>2</sup>Changchun Institute of Applied Chemistry, Chinese Academy of Sciences, Changchun 130022, P.R. China.

## Calculations method

First-principles was employed to conduct density functional theory (DFT) calculation in generalized gradient approximation (GGA) with Perdew-Burke-Ernzerhof (PBE) form.<sup>1-3</sup> The projected augmented wave (PAW) potentials were chosen to describe the ionic cores and valence electron was considered using a plane wave basis set with a kinetic energy cutoff of 450 eV.<sup>4,5</sup> Partial occupancies of the Kohn-Sham orbitals were allowed with the Gaussian smearing method and a width of 0.05 eV. For optimizing the geometry and lattice size, the Brillouin zone integration was performed with a 0.04 Å<sup>-1</sup> *k*-mesh Monkhorst-Pack sampling.<sup>6</sup> The self-consistent calculations applied a convergence energy threshold of 10<sup>-5</sup> eV. The equilibrium geometries and lattice constants were optimized with maximum stress on each atom within 0.02 eV Å<sup>-1</sup>. 15 Å vacuum layer was normally added to the surface to eliminate the artificial interactions between periodic images. The weak interaction was described by DFT+D3 method using empirical correction in Grimme's scheme.<sup>7,8</sup> Spin polarization method was adopted to describe the magnetic system. Isosurface level of charge density difference was set at 0.002 eV Å<sup>-3</sup>. The adsorption energy was calculated as:  $E_{ad} = E_{total} - E_{Li_2S_4} - E_{adsorbent}$ , in which  $E_{total}$ ,  $E_{Li_2S_4}$  and  $E_{adsorbent}$  represent the total energy of Li<sub>2</sub>S<sub>4</sub> on adsorbent, Li<sub>2</sub>S<sub>4</sub> and adsorbent, respectively.<sup>9</sup>

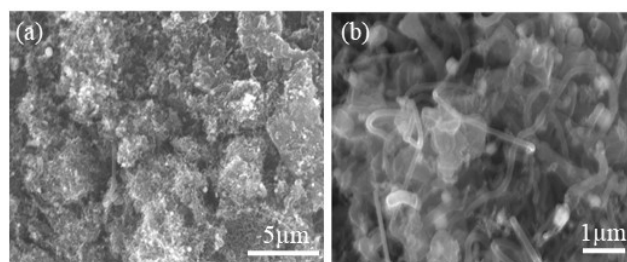

**Fig. S1** SEM images of FeCoNiZnCu-NCNT: (a) low-magnification, (b) high-magnification

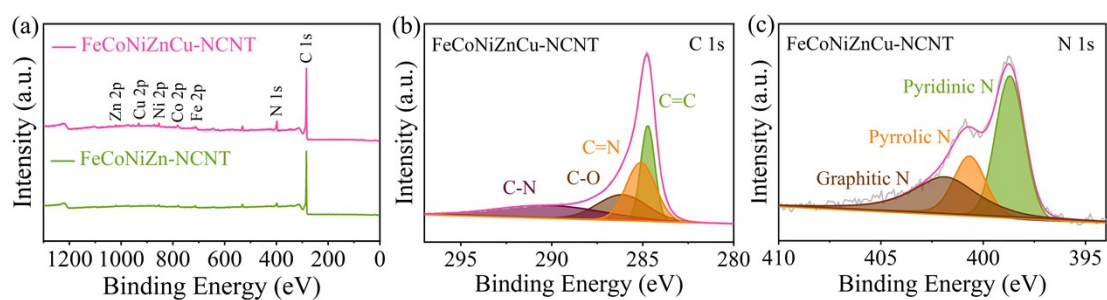

**Fig. S2** (a) XPS full spectrum of FeCoNiZnCu-NCNT and FeCoNiZnCu-NCNT. XPS spectra of FeCoNiZnCu-NCNT: (b) C 1s, (c) N 1s

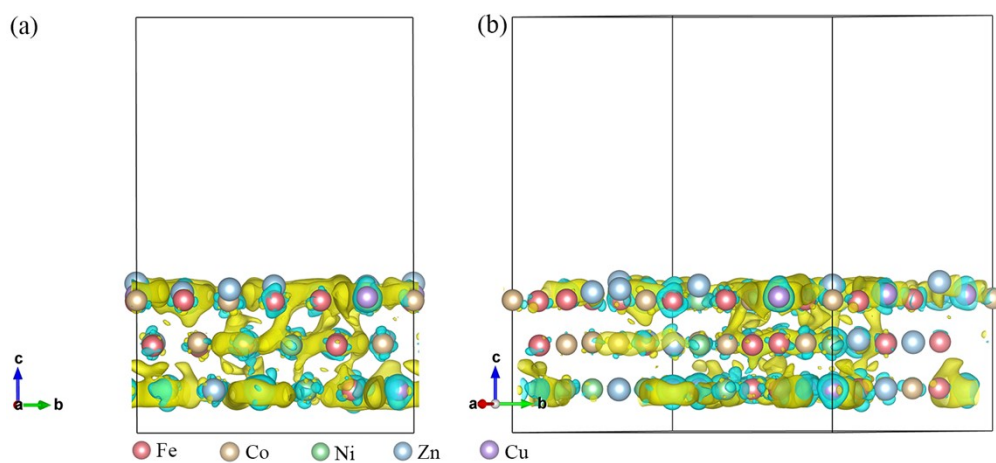

**Fig. S3** Electron density difference of FeCoNiZnCu from different directions of (a) and (b)

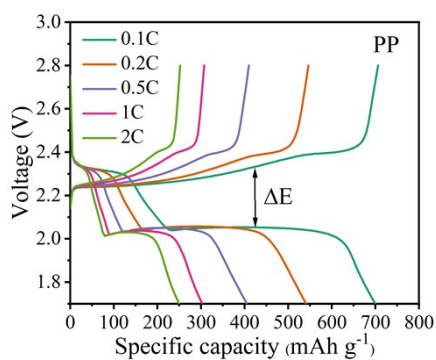

**Fig. S4** First galvanostatic charge-discharge profiles of Li-S batteries with blank separator at different rates

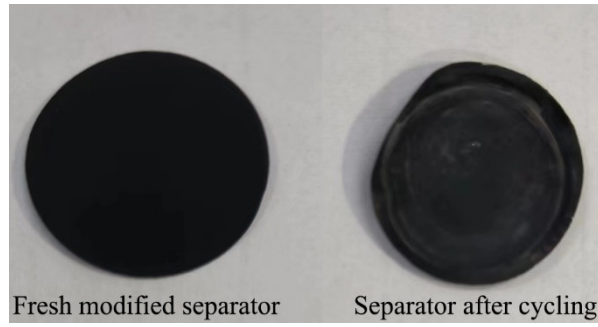

**Fig. S5** Photos of modified separator before and after the battery was cycled

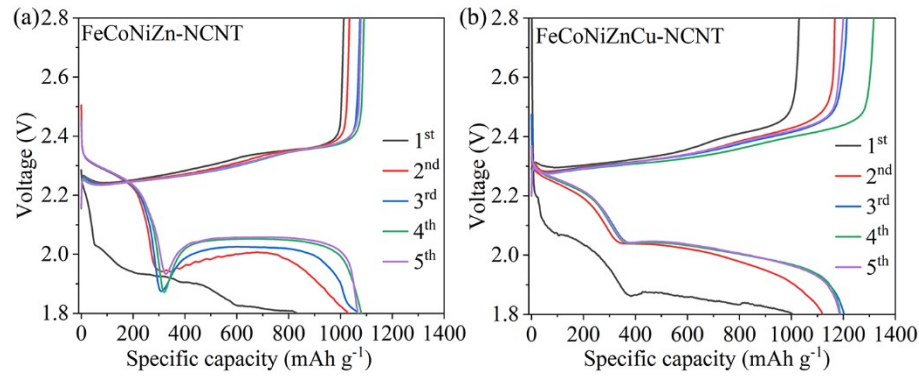

**Fig. S6** Charge-discharge curves of the pouch cells at 0.1 C: (a) FeCoNiZn-NCNT, (b) FeCoNiZnCu-NCNT

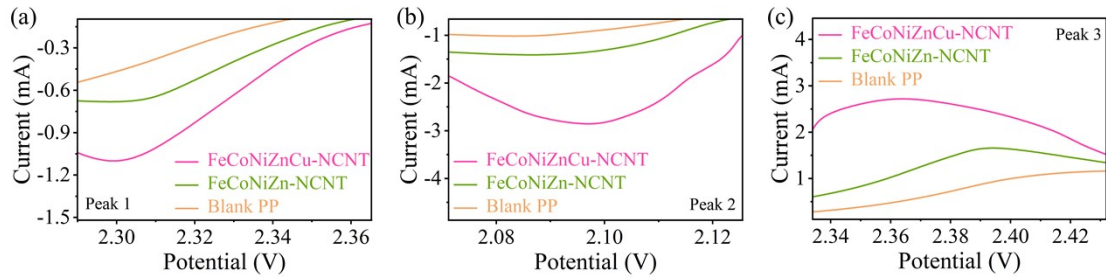

**Fig. S7** Locally amplified CV curves of Fig. 5(a): (a) Peak 1, (b) Peak 2, (c) Peak 3

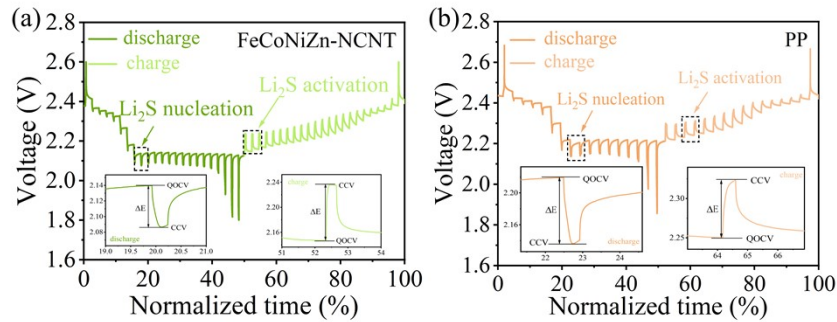

**Fig. S8** GITT plots of LSBs with (a) FeCoNiZn-NCNT modified separator and (b) blank separator in the first discharge/charge process under the current density of 0.1 C

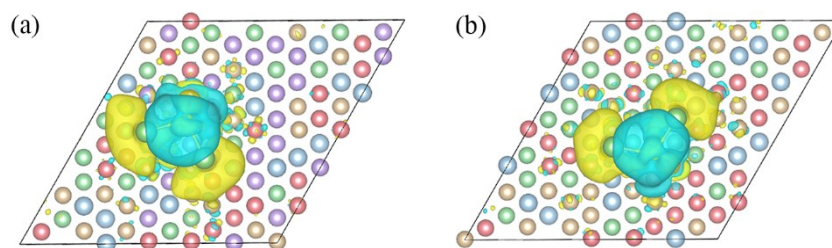

**Fig. S9** Charge density difference diagram of  $\text{Li}_2\text{S}_4$  adsorbed on different catalyst surfaces, in which charge accumulation is represented by yellow region, charge depletion is represented by cyan region

**Table S1** Comparison of electrochemical performance to other papers related to HEA catalysts

| Materials    | Specific capacity at 0.1C ( $\text{mAh g}^{-1}$ ) | Capacity retention | Specific capacity at 1C ( $\text{mAh g}^{-1}$ ) | Decay rate         | Ref.               |
|--------------|---------------------------------------------------|--------------------|-------------------------------------------------|--------------------|--------------------|
| FeCoNiZnCu   | 1301.6                                            | 75%                | 820.9 (1C)                                      | 0.07% (600 cycles) | This work          |
| FeCoNiCuMn   | 1494.1                                            | 70.7%              | 740.1 (1C)                                      | 0.05% (970 cycles) | Ref. <sup>10</sup> |
| FeCoNiMnZn   | About 1200 (0.2C)                                 | -                  | 816 (2C)                                        | 0.03% (500 cycles) | Ref. <sup>11</sup> |
| MgCrMnFeCoNi | 1301.5                                            | -                  | 752.2 (2C)                                      | -                  | Ref. <sup>12</sup> |

**Table S2** Comparison of adsorption energy of catalysts for  $\text{Li}_2\text{S}_4$  to other papers

| Materials                             | LiPSs                   | Adsorption energy | Ref.               |
|---------------------------------------|-------------------------|-------------------|--------------------|
| FeCoNiZn                              | $\text{Li}_2\text{S}_4$ | -7.44 eV          | This work          |
| Defective MoSe <sub>2</sub>           | $\text{Li}_2\text{S}_4$ | -6.84 eV          | Ref. <sup>13</sup> |
| CoP                                   | $\text{Li}_2\text{S}_6$ | -2.6 eV           | Ref. <sup>14</sup> |
| SnO <sub>2</sub>                      | $\text{Li}_2\text{S}_4$ | -5.46 eV          | Ref. <sup>15</sup> |
| CoNiO <sub>2</sub>                    | $\text{Li}_2\text{S}_6$ | -5.69 eV          | Ref. <sup>16</sup> |
| CoNiO <sub>2</sub> /Co <sub>4</sub> N | $\text{Li}_2\text{S}_6$ | -4.48 eV          |                    |
| Ni <sub>0.2</sub> Mo <sub>0.8</sub> N | $\text{Li}_2\text{S}_4$ | -2.01 eV          | Ref. <sup>17</sup> |
| Cu <sub>0.1</sub> Co <sub>0.9</sub> P | $\text{Li}_2\text{S}_6$ | -5.58 eV          | Ref. <sup>18</sup> |
| P@NiTe <sub>2-x</sub>                 | $\text{Li}_2\text{S}_6$ | -5.26 eV          | Ref. <sup>19</sup> |

## References

- 1 G. Kresse and J. Furthmüller, *Comput. Mater. Sci.*, 1996, **6**, 15-50.
- 2 G. Kresse and J. Furthmüller, *Phys. Rev. B.*, 1996, **54**, 11169-11186.
- 3 J. P. Perdew, K. Burke, and M. Ernzerhof, *Phys. Rev. Lett.*, 1996, **77**, 3865-3868.
- 4 G. Kresse and D. Joubert, *Phys. Rev. B.*, 1999, **59**, 1758-1775.
- 5 P. E. Blöchl, *Phys. Rev. B.*, 1994, **50**, 17953-17979.
- 6 H. J. Monkhorst and J. D. Pack, *Phys. Rev.*, 1976, **13**, 5188-5192.
- 7 S. Grimme, J. Antony, S. Ehrlich, and H. Krieg, *J. Chem. Phys.*, 2010, **132**, 154104.
- 8 S. Grimme, S. Ehrlich, and L. Goerigk, *J. Comput. Chem.*, 2011, **32**, 1456-1465.
- 9 Y. Guo, J. Li, G. Q. Yuan, J. P. Guo, Y. Zheng, Y. K. Huang, Q. Zhang, J. L. Li, J. J. Shen, C. H. Shu, J. C. Xu, Y. X. Tang, W. Lei, and H. Y. Shao, *ACS Nano*, 2023, **17**, 18253-18265.
- 10 Z. Wang, H. Ge, S. Liu, G. Li, and X. Gao, *Energy Environ. Mater.*, 2023, **6**, e12358.
- 11 H. Xu, R. Hu, Y. Zhang, H. Yan, Q. Zhu, J. Shang, S. Yang and B. Li, *Energy Storage Mater.*,

- 2021, **43**, 212-220.
- 12 Z. Zhou, Z. Chen, H. Lv, Y. Zhao, H. Wei, G. Huai, R. Xu and Y. Wang, *J. Mater. Chem. A*, 2023, **11**, 5883-5894.
  - 13 Y. Guo, J. Li, G. Q. Yuan, J. P. Guo, Y. Zheng, Y. K. Huang, Q. Zhang, J. L. Li, J. J. Shen, C. H. Shu, J. C. Xu, Y. X. Tang, W. Lei, and H. Y. Shao, *ACS Nano*, 2023, **17**, 18253-18265.
  - 14 W. Zhang, H. Pan, N. Han, S. Feng, X. Zhang, W. Guo, P. Tan, S. Xie, Z. Zhou, Q. Ma, X. Guo, A. Vlad, M. Wübbenhorst, J. Luo and J. Fransaer, *Adv. Energy Mater.*, 2023, **13**, 2301551.
  - 15 B. Jiang, Y. Qiu, D. Tian, Y. Zhang, X. Song, C. Zhao, M. Wang, X. Sun, H. Huang, C. Zhao, H. Zhou, A. Chen, L. Fan and N. Zhang, *Adv. Energy Mater.*, 2021, **11**, 2102995.
  - 16 J. Pu, W. Gong, Z. Shen, L. Wang, Y. Yao and G. Hong, *Adv Sci.*, 2022, **9**, 2104375.
  - 17 H. Y. Zhang, R. Q. Dai, S. Zhu, L. Z. Zhou, Q. J. Xu and Y. L. Min, *Chem. Eng. J.*, 2022, **429**, 132454.
  - 18 J. Shan, W. Wang, B. Zhang, X. Wang, W. Zhou, L. Yue and Y. Li, *Adv Sci.*, 2022, **9**, 2204192.
  - 19 W. Yao, C. Tian, C. Yang, J. Xu, Y. Meng, I. Manke, N. Chen, Z. Wu, L. Zhan, Y. Wang and R. Chen, *Adv. Mater.*, 2022, **34**, e2106370.
